# Supplementary material for: The interaction between microbiota and immune in intestinal inflammatory diseases: Global research status and trends
Source: Front Cell Infect Microbiol. 2023 Feb 7;13:1128249. doi: 10.3389/fcimb.2023.1128249 (PMC9941562; doi:10.3389/fcimb.2023.1128249)
Supplement: Supplementary file 1 [file Table_1.xlsx]

## Sheet: savedrecs
Supplementary Table 1. Detailed information on 184 citation classics
Titles	Authors	Journals	Public date	Years	Volume	Issue	Start page	End page	DOI	Total number of citations	Average number of citations per year
Interactions Between the Microbiota and the Immune System	Hooper, Lora V.; Littman, Dan R.; Macpherson, Andrew J.	SCIENCE	JUN 8 2012	2012	336	6086	1268	1273	10.1126/science.1223490	2429	220.82
Role of the Microbiota in Immunity and Inflammation	Belkaid, Yasmine; Hand, Timothy W.	CELL	MAR 27 2014	2014	157	1	121	141	10.1016/j.cell.2014.03.011	2192	243.56
The Impact of the Gut Microbiota on Human Health: An Integrative View	Clemente, Jose C.; Ursell, Luke K.; Parfrey, Laura Wegener; Knight, Rob	CELL	MAR 16 2012	2012	148	6	1258	1270	10.1016/j.cell.2012.01.035	1987	180.64
The gut microbiota - masters of host development and physiology	Sommer, Felix; Baeckhed, Fredrik	NATURE REVIEWS MICROBIOLOGY	APR 2013	2013	11	4	227	238	10.1038/nrmicro2974	1852	185.2
The Treatment-Naive Microbiome in New-Onset Crohn's Disease	Gevers, Dirk; Kugathasan, Subra; Denson, Lee A.; Vazquez-Baeza, Yoshiki; Van Treuren, Will; Ren, Boyu; Schwager, Emma; Knights, Dan; Song, Se Jin; Yassour, Moran; Morgan, Xochitl C.; Kostic, Aleksandar D.; Luo, Chengwei; Gonzalez, Antonio; McDonald, Daniel; Haberman, Yael; Walters, Thomas; Baker, Susan; Rosh, Joel; Stephens, Michael; Heyman, Melvin; Markowitz, James; Baldassano, Robert; Griffiths…	CELL HOST & MICROBE	MAR 12 2014	2014	15	3	382	392	10.1016/j.chom.2014.02.005	1721	191.22
Dysfunction of the intestinal microbiome in inflammatory bowel disease and treatment	Morgan, Xochitl C.; Tickle, Timothy L.; Sokol, Harry; Gevers, Dirk; Devaney, Kathryn L.; Ward, Doyle V.; Reyes, Joshua A.; Shah, Samir A.; LeLeiko, Neal; Snapper, Scott B.; Bousvaros, Athos; Korzenik, Joshua; Sands, Bruce E.; Xavier, Ramnik J.; Huttenhower, Curtis	GENOME BIOLOGY	2012	2012	13	9			10.1186/gb-2012-13-9-r79	1566	142.36
Gut microbiota, metabolites and host immunity	Rooks, Michelle G.; Garrett, Wendy S.	NATURE REVIEWS IMMUNOLOGY	JUN 2016	2016	16	6	341	352	10.1038/nri.2016.42	1332	190.29
Crohn's disease	Baumgart, Daniel C.; Sandborn, William J.	LANCET	NOV 3 2012	2012	380	9853	1590	1605	10.1016/S0140-6736(12)60026-9	1244	113.09
Role of the gut microbiota in immunity and inflammatory disease	Kamada, Nobuhiko; Seo, Sang-Uk; Chen, Grace Y.; Nunez, Gabriel	NATURE REVIEWS IMMUNOLOGY	MAY 2013	2013	13	5	321	335	10.1038/nri3430	1232	123.2
The gut microbiota and host health: a new clinical frontier	Marchesi, Julian R.; Adams, David H.; Fava, Francesca; Hermes, Gerben D. A.; Hirschfield, Gideon M.; Hold, Georgina; Quraishi, Mohammed Nabil; Kinross, James; Smidt, Hauke; Tuohy, Kieran M.; Thomas, Linda V.; Zoetendal, Erwin G.; Hart, Ailsa	GUT	FEB 2016	2016	65	2	330	339	10.1136/gutjnl-2015-309990	1176	168
Microbial Exposure During Early Life Has Persistent Effects on Natural Killer T Cell Function	Olszak, Torsten; An, Dingding; Zeissig, Sebastian; Vera, Miguel Pinilla; Richter, Julia; Franke, Andre; Glickman, Jonathan N.; Siebert, Reiner; Baron, Rebecca M.; Kasper, Dennis L.; Blumberg, Richard S.	SCIENCE	APR 27 2012	2012	336	6080	489	493	10.1126/science.1219328	1041	94.64
The Microbiome in Inflammatory Bowel Disease: Current Status and the Future Ahead	Kostic, Aleksandar D.; Xavier, Ramnik J.; Gevers, Dirk	GASTROENTEROLOGY	MAY 2014	2014	146	6	1489	1499	10.1053/j.gastro.2014.02.009	995	110.56
Introduction to the human gut microbiota	Thursby, Elizabeth; Juge, Nathalie	BIOCHEMICAL JOURNAL	JUN 1 2017	2017	474	11	1823	1836	10.1042/BCJ20160510	995	165.83
The microbial metabolite butyrate regulates intestinal macrophage function via histone deacetylase inhibition	Chang, Pamela V.; Hao, Liming; Offermanns, Stefan; Medzhitov, Ruslan	PROCEEDINGS OF THE NATIONAL ACADEMY OF SCIENCES OF THE UNITED STATES OF AMERICA	FEB 11 2014	2014	111	6	2247	2252	10.1073/pnas.1322269111	983	109.22
Dietary emulsifiers impact the mouse gut microbiota promoting colitis and metabolic syndrome	Chassaing, Benoit; Koren, Omry; Goodrich, Julia K.; Poole, Angela C.; Srinivasan, Shanthi; Ley, Ruth E.; Gewirtz, Andrew T.	NATURE	MAR 5 2015	2015	519	7541	92	U192	10.1038/nature14232	959	119.88
Influence of diet on the gut microbiome and implications for human health	Singh, Rasnik K.; Chang, Hsin-Wen; Yan, Di; Lee, Kristina M.; Ucmak, Derya; Wong, Kirsten; Abrouk, Michael; Farahnik, Benjamin; Nakamura, Mio; Zhu, Tian Hao; Bhutani, Tina; Liao, Wilson	JOURNAL OF TRANSLATIONAL MEDICINE	APR 8 2017	2017	15				10.1186/s12967-017-1175-y	944	157.33
The microbiome and cancer	Schwabe, Robert F.; Jobin, Christian	NATURE REVIEWS CANCER	NOV 2013	2013	13	11	800	812	10.1038/nrc3610	930	93
Reciprocal interactions of the intestinal microbiota and immune system	Maynard, Craig L.; Elson, Charles O.; Hatton, Robin D.; Weaver, Casey T.	NATURE	SEP 13 2012	2012	489	7415	231	241	10.1038/nature11551	898	81.64
Intestinal permeability - a new target for disease prevention and therapy	Bischoff, Stephan C.; Barbara, Giovanni; Buurman, Wim; Ockhuizen, Theo; Schulzke, Joerg-Dieter; Serino, Matteo; Tilg, Herbert; Watson, Alastair; Wells, Jerry M.	BMC GASTROENTEROLOGY	NOV 18 2014	2014	14				10.1186/s12876-014-0189-7	832	92.44
How colonization by microbiota in early life shapes the immune system	Gensollen, Thomas; Iyer, Shankar S.; Kasper, Dennis L.; Blumberg, Richard S.	SCIENCE	APR 29 2016	2016	352	6285	539	544	10.1126/science.aad9378	829	118.43
What is the Healthy Gut Microbiota Composition? A Changing Ecosystem across Age, Environment, Diet, and Diseases	Rinninella, Emanuele; Raoul, Pauline; Cintoni, Marco; Franceschi, Francesco; Miggiano, Giacinto Abele Donato; Gasbarrini, Antonio; Mele, Maria Cristina	MICROORGANISMS	JAN 2019	2019	7	1			10.3390/microorganisms7010014	823	205.75
Current understanding of the human microbiome	Gilbert, Jack A.; Blaser, Martin J.; Caporaso, J. Gregory; Jansson, Janet K.; Lynch, Susan V.; Knight, Rob	NATURE MEDICINE	APR 2018	2018	24	4	392	400	10.1038/nm.4517	794	158.8
Microbiota-mediated colonization resistance against intestinal pathogens	Buffie, Charlie G.; Pamer, Eric G.	NATURE REVIEWS IMMUNOLOGY	NOV 2013	2013	13	11	790	801	10.1038/nri3535	752	75.2
Regional specialization within the intestinal immune system	Mowat, Allan M.; Agace, William W.	NATURE REVIEWS IMMUNOLOGY	OCT 2014	2014	14	10	667	685	10.1038/nri3738	726	80.67
Immunopathogenesis of IBD: current state of the art	de Souza, Heitor S. P.; Fiocchi, Claudio	NATURE REVIEWS GASTROENTEROLOGY & HEPATOLOGY	JAN 2016	2016	13	1	13	27	10.1038/nrgastro.2016.186	735	105
Bifidobacteria and Butyrate-Producing Colon Bacteria: Importance and Strategies for Their Stimulation in the Human Gut	Riviere, Audrey; Selak, Marija; Lantin, David; Leroy, Frederic; De Vuyst, Luc	FRONTIERS IN MICROBIOLOGY	JUN 28 2016	2016	7				10.3389/fmicb.2016.00979	702	100.29
Interactions Between Commensal Fungi and the C-Type Lectin Receptor Dectin-1 Influence Colitis	Iliev, Iliyan D.; Funari, Vincent A.; Taylor, Kent D.; Quoclinh Nguyen; Reyes, Christopher N.; Strom, Samuel P.; Brown, Jordan; Becker, Courtney A.; Fleshner, Phillip R.; Dubinsky, Marla; Rotter, Jerome I.; Wang, Hanlin L.; McGovern, Dermot P. B.; Brown, Gordon D.; Underhill, David M.	SCIENCE	JUN 8 2012	2012	336	6086	1314	1317	10.1126/science.1221789	677	61.55
CARD9 impacts colitis by altering gut microbiota metabolism of tryptophan into aryl hydrocarbon receptor ligands	Lamas, Bruno; Richard, Mathias L.; Leducq, Valentin; Pham, Hang-Phuong; Michel, Marie-Laure; Da Costa, Gregory; Bridonneau, Chantal; Jegou, Sarah; Hoffmann, Thomas W.; Natividad, Jane M.; Brot, Loic; Taleb, Soraya; Couturier-Maillard, Aurelie; Nion-Larmurier, Isabelle; Merabtene, Fatiha; Seksik, Philippe; Bourrier, Anne; Cosnes, Jacques; Ryffel, Bernhard; Beaugerie, Laurent; Launay, Jean-Marie; L…	NATURE MEDICINE	JUN 2016	2016	22	6	598	+	10.1038/nm.4102	645	92.14
Dysbiosis and the immune system	Levy, Maayan; Kolodziejczyk, Aleksandra A.; Thaiss, Christoph A.; Elinav, Eran	NATURE REVIEWS IMMUNOLOGY	APR 2017	2017	17	4	219	232	10.1038/nri.2017.7	623	103.83
Gut microbiota and IBD: causation or correlation?	Ni, Josephine; Wu, Gary D.; Albenberg, Lindsey; Tomov, Vesselin T.	NATURE REVIEWS GASTROENTEROLOGY & HEPATOLOGY	OCT 2017	2017	14	10	573	584	10.1038/nrgastro.2017.88	625	104.17
Signals from the gut microbiota to distant organs in physiology and disease	Schroeder, Bjoern; Backhed, Fredrik	NATURE MEDICINE	OCT 2016	2016	22	10	1079	1089	10.1038/nm.4185	613	87.57
Commensal Bacteria Calibrate the Activation Threshold of Innate Antiviral Immunity	Abt, Michael C.; Osborne, Lisa C.; Monticelli, Laurel A.; Doering, Travis A.; Alenghat, Theresa; Sonnenberg, Gregory F.; Paley, Michael A.; Antenus, Marcelo; Williams, Katie L.; Erikson, Jan; Wherry, E. John; Artis, David	IMMUNITY	JUL 27 2012	2012	37	1	158	170	10.1016/j.immuni.2012.04.011	596	54.18
Environmental biodiversity, human microbiota, and allergy are interrelated	Hanski, Ilkka; von Hertzen, Leena; Fyhrquist, Nanna; Koskinen, Kaisa; Torppa, Kaisa; Laatikainen, Tiina; Karisola, Piia; Auvinen, Petri; Paulin, Lars; Makela, Mika J.; Vartiainen, Erkki; Kosunen, Timo U.; Alenius, Harri; Haahtela, Tari	PROCEEDINGS OF THE NATIONAL ACADEMY OF SCIENCES OF THE UNITED STATES OF AMERICA	MAY 22 2012	2012	109	21	8334	8339	10.1073/pnas.1205624109	596	54.18
Microbial tryptophan catabolites in health and disease	Roager, Henrik M.; Licht, Tine R.	NATURE COMMUNICATIONS	AUG 17 2018	2018	9				10.1038/s41467-018-05470-4	588	117.6
Extrathymically generated regulatory T cells control mucosal T(H)2 inflammation	Josefowicz, Steven Z.; Niec, Rachel E.; Kim, Hye Young; Treuting, Piper; Chinen, Takatoshi; Zheng, Ye; Umetsu, Dale T.; Rudensky, Alexander Y.	NATURE	FEB 16 2012	2012	482	7385	395	U1510	10.1038/nature10772	581	52.82
Epithelial antimicrobial defence of the skin and intestine	Gallo, Richard L.; Hooper, Lora V.	NATURE REVIEWS IMMUNOLOGY	JUL 2012	2012	12	7	503	516	10.1038/nri3228	555	50.45
Baseline gut microbiota predicts clinical response and colitis in metastatic melanoma patients treated with ipilimumab	Chaput, N.; Lepage, P.; Coutzac, C.; Soularue, E.; Le Roux, K.; Monot, C.; Boselli, L.; Routier, E.; Cassard, L.; Collins, M.; Vaysse, T.; Marthey, L.; Eggermont, A.; Asvatourian, V.; Lanoy, E.; Mateus, C.; Robert, C.; Carbonnel, F.	ANNALS OF ONCOLOGY	JUN 2017	2017	28	6	1368	1379	10.1093/annonc/mdx108	553	92.17
Regulation of immune cell function by short-chain fatty acids	Correa, Renan Oliveira; Fachi, Jose Luis; Vieira, Aline; Sato, Fabio Takeo; Vinolo, Marco Aurelio R.	CLINICAL & TRANSLATIONAL IMMUNOLOGY	APR 2016	2016	5				10.1038/cti.2016.17	547	78.14
Compartmentalized Control of Skin Immunity by Resident Commensals	Naik, Shruti; Bouladoux, Nicolas; Wilhelm, Christoph; Molloy, Michael J.; Salcedo, Rosalba; Kastenmuller, Wolfgang; Deming, Clayton; Quinones, Mariam; Koo, Lily; Conlan, Sean; Spencer, Sean; Hall, Jason A.; Dzutsev, Amiran; Kong, Heidi; Campbell, Daniel J.; Trinchieri, Giorgio; Segre, Julia A.; Belkaid, Yasmine	SCIENCE	AUG 31 2012	2012	337	6098	1115	1119	10.1126/science.1225152	539	49
Gut microbiota: Role in pathogen colonization, immune responses, and inflammatory disease	Pickard, Joseph M.; Zeng, Melody Y.; Caruso, Roberta; Nunez, Gabriel	IMMUNOLOGICAL REVIEWS	SEP 2017	2017	279	1	70	89	10.1111/imr.12567	537	89.5
Probiotic Mechanisms of Action	Bermudez-Brito, Miriam; Plaza-Diaz, Julio; Munoz-Quezada, Sergio; Gomez-Llorente, Carolina; Gil, Angel	ANNALS OF NUTRITION AND METABOLISM	2012	2012	61	2	160	174	10.1159/000342079	534	48.55
Intestinal microbiome analyses identify melanoma patients at risk for checkpoint-blockade-induced colitis	Dubin, Krista; Callahan, Margaret K.; Ren, Boyu; Khanin, Raya; Viale, Agnes; Ling, Lilan; No, Daniel; Gobourne, Asia; Littmann, Eric; Huttenhower, Curtis; Pamer, Eric G.; Wolchok, Jedd D.	NATURE COMMUNICATIONS	FEB 2016	2016	7				10.1038/ncomms10391	522	74.57
The effects of intestinal tract bacterial diversity on mortality following allogeneic hematopoietic stem cell transplantation	Taur, Ying; Jenq, Robert R.; Perales, Miguel-Angel; Littmann, Eric R.; Morjaria, Sejal; Ling, Lilan; No, Daniel; Gobourne, Asia; Viale, Agnes; Dahi, Parastoo B.; Ponce, Doris M.; Barker, Juliet N.; Giralt, Sergio; van den Brink, Marcel; Pamer, Eric G.	BLOOD	AUG 14 2014	2014	124	7	1174	1182	10.1182/blood-2014-02-554725	498	55.33
The intestinal microbiome in early life: health and disease	Arrieta, Marie-Claire; Stiemsma, Leah T.; Amenyogbe, Nelly; Brown, Eric M.; Finlay, Brett	FRONTIERS IN IMMUNOLOGY	SEP 5 2014	2014	5				10.3389/fimmu.2014.00427	484	53.78
Impact of the Gut Microbiota on Intestinal Immunity Mediated by Tryptophan Metabolism	Gao, Jing; Xu, Kang; Liu, Hongnan; Liu, Gang; Bai, Miaomiao; Peng, Can; Li, Tiejun; Yin, Yulong	FRONTIERS IN CELLULAR AND INFECTION MICROBIOLOGY	FEB 6 2018	2018	8				10.3389/fcimb.2018.00013	475	95
Age-Associated Microbial Dysbiosis Promotes Intestinal Permeability, Systemic Inflammation, and Macrophage Dysfunction	Thevaranjan, Netusha; Puchta, Alicja; Schulz, Christian; Naidoo, Avee; Szamosi, J. C.; Verschoor, Chris P.; Loukov, Dessi; Schenck, Louis P.; Jury, Jennifer; Foley, Kevin P.; Schertzer, Jonathan D.; Larche, Maggie J.; Davidson, Donald J.; Verdu, Elena F.; Surette, Michael G.; Bowdish, Dawn M. E.	CELL HOST & MICROBE	APR 12 2017	2017	21	4	455	+	10.1016/j.chom.2017.03.002	468	78
The intestinal epithelial barrier: a therapeutic target?	Odenwald, Matthew A.; Turner, Jerrold R.	NATURE REVIEWS GASTROENTEROLOGY & HEPATOLOGY	JAN 2017	2017	14	1	9	21	10.1038/nrgastro.2016.169	452	75.33
Defining dysbiosis and its influence on host immunity and disease	Petersen, Charisse; Round, June L.	CELLULAR MICROBIOLOGY	JUL 2014	2014	16	7	1024	1033	10.1111/cmi.12308	436	48.44
Decreased Bacterial Diversity Characterizes the Altered Gut Microbiota in Patients With Psoriatic Arthritis, Resembling Dysbiosis in Inflammatory Bowel Disease	Scher, Jose U.; Ubeda, Carles; Artacho, Alejandro; Attur, Mukundan; Isaac, Sandrine; Reddy, Soumya M.; Marmon, Shoshana; Neimann, Andrea; Brusca, Samuel; Patel, Tejas; Manasson, Julia; Pamer, Eric G.; Littman, Dan R.; Abramson, Steven B.	ARTHRITIS & RHEUMATOLOGY	JAN 2015	2015	67	1	128	139	10.1002/art.38892	429	53.63
Role of the gut microbiota in health and chronic gastrointestinal disease: understanding a hidden metabolic organ	Guinane, Caitriona M.; Cotter, Paul D.	THERAPEUTIC ADVANCES IN GASTROENTEROLOGY	JUL 2013	2013	6	4	295	308	10.1177/1756283X13482996	427	42.7
The role of microbiome in central nervous system disorders	Wang, Yan; Kasper, Lloyd H.	BRAIN BEHAVIOR AND IMMUNITY	MAY 2014	2014	38		1	12	10.1016/j.bbi.2013.12.015	419	46.56
Dysbiosis of the Gut Microbiota Is Associated with HIV Disease Progression and Tryptophan Catabolism	Vujkovic-Cvijin, Ivan; Dunham, Richard M.; Iwai, Shoko; Maher, Michael C.; Albright, Rebecca G.; Broadhurst, Mara J.; Hernandez, Ryan D.; Lederman, Michael M.; Huang, Yong; Somsouk, Ma; Deeks, Steven G.; Hunt, Peter W.; Lynch, Susan V.; McCune, Joseph M.	SCIENCE TRANSLATIONAL MEDICINE	JUL 10 2013	2013	5	193			10.1126/scitranslmed.3006438	404	40.4
Roles for Intestinal Bacteria, Viruses, and Fungi in Pathogenesis of Inflammatory Bowel Diseases and Therapeutic Approaches	Sartor, R. Balfour; Wu, Gary D.	GASTROENTEROLOGY	FEB 2017	2017	152	2	327	+	10.1053/j.gastro.2016.10.012	412	68.67
NOD proteins: regulators of inflammation in health and disease	Philpott, Dana J.; Sorbara, Matthew T.; Robertson, Susan J.; Croitoru, Kenneth; Girardin, Stephen E.	NATURE REVIEWS IMMUNOLOGY	JAN 2014	2014	14	1	9	23	10.1038/nri3565	397	44.11
The Gut Microbiome, Kidney Disease, and Targeted Interventions	Ramezani, Ali; Raj, Dominic S.	JOURNAL OF THE AMERICAN SOCIETY OF NEPHROLOGY	APR 2014	2014	25	4	657	670	10.1681/ASN.2013080905	396	44
Diet-Induced Dysbiosis of the Intestinal Microbiota and the Effects on Immunity and Disease	Brown, Kirsty; DeCoffe, Daniella; Molcan, Erin; Gibson, Deanna L.	NUTRIENTS	AUG 2012	2012	4	8	1095	1119	10.3390/nu4081095	387	35.18
IBD-what role do Proteobacteria play?	Mukhopadhya, Indrani; Hansen, Richard; El-Omar, Emad M.; Hold, Georgina L.	NATURE REVIEWS GASTROENTEROLOGY & HEPATOLOGY	APR 2012	2012	9	4	219	230	10.1038/nrgastro.2012.14	387	35.18
The gut microbiota and inflammatory bowel disease	Matsuoka, Katsuyoshi; Kanai, Takanori	SEMINARS IN IMMUNOPATHOLOGY	JAN 2015	2015	37	1	47	55	10.1007/s00281-014-0454-4	386	48.25
Paneth Cells: Maestros of the Small Intestinal Crypts	Clevers, Hans C.; Bevins, Charles L.	ANNUAL REVIEW OF PHYSIOLOGY, VOL 75	2013	2013	75		289	311	10.1146/annurev-physiol-030212-183744	373	37.3
Microbiota metabolite short chain fatty acids, GPCR, and inflammatory bowel diseases	Sun, Mingming; Wu, Wei; Liu, Zhanju; Cong, Yingzi	JOURNAL OF GASTROENTEROLOGY	JAN 2017	2017	52	1	1	8	10.1007/s00535-016-1242-9	367	61.17
Brain-Gut Interactions in Inflammatory Bowel Disease	Bonaz, Bruno L.; Bernstein, Charles N.	GASTROENTEROLOGY	JAN 2013	2013	144	1	36	49	10.1053/j.gastro.2012.10.003	367	36.7
The intestinal barrier: a fundamental role in health and disease	Vancamelbeke, Maaike; Vermeire, Severine	EXPERT REVIEW OF GASTROENTEROLOGY & HEPATOLOGY	2017	2017	11	9	821	834	10.1080/17474124.2017.1343143	365	60.83
Outer Membrane Vesicles of a Human Commensal Mediate Immune Regulation and Disease Protection	Shen, Yue; Torchia, Maria Letizia Giardino; Lawson, Gregory W.; Karp, Christopher L.; Ashwell, Jonathan D.; Mazmanian, Sarkis K.	CELL HOST & MICROBE	OCT 18 2012	2012	12	4	509	520	10.1016/j.chom.2012.08.004	357	32.45
The Human Gut Microbiome - A Potential Controller of Wellness and Disease	Kho, Zhi Y.; Lal, Sunil K.	FRONTIERS IN MICROBIOLOGY	AUG 14 2018	2018	9				10.3389/fmicb.2018.01835	360	72
Understanding the Holobiont: How Microbial Metabolites Affect Human Health and Shape the Immune System	Postler, Thomas Siegmund; Ghosh, Sankar	CELL METABOLISM	JUL 5 2017	2017	26	1	110	130	10.1016/j.cmet.2017.05.008	354	59
Inflammation and colorectal cancer: colitis-associated neoplasia	Grivennikov, Sergei I.	SEMINARS IN IMMUNOPATHOLOGY	MAR 2013	2013	35	2	229	244	10.1007/s00281-012-0352-6	343	34.3
Innate immune recognition of the microbiota promotes host-microbial symbiosis	Chu, Hiutung; Mazmanian, Sarkis K.	NATURE IMMUNOLOGY	JUL 2013	2013	14	7	668	675	10.1038/ni.2635	328	32.8
Mechanisms of inflammation-driven bacterial dysbiosis in the gut	Zeng, M. Y.; Inohara, N.; Nunez, G.	MUCOSAL IMMUNOLOGY	JAN 2017	2017	10	1	18	26	10.1038/mi.2016.75	312	52
The Intestinal Epithelium: Central Coordinator of Mucosal Immunity	Allaire, Joannie M.; Crowley, Shauna M.; Law, Hong T.; Chang, Sun-Young; Ko, Hyun-Jeong; Vallance, Bruce A.	TRENDS IN IMMUNOLOGY	SEP 2018	2018	39	9	677	696	10.1016/j.it.2018.04.002	298	59.6
Mechanisms of Action of Probiotics	Plaza-Diaz, Julio; Javier Ruiz-Ojeda, Francisco; Gil-Campos, Mercedes; Gil, Angel	ADVANCES IN NUTRITION	JAN 2019	2019	10		S49	S66	10.1093/advances/nmy063	297	74.25
Role of intestinal microbiota and metabolites on gut homeostasis and human diseases	Lin, Lan; Zhang, Jianqiong	BMC IMMUNOLOGY	JAN 6 2017	2017	18				10.1186/s12865-016-0187-3	295	49.17
Microbial contact during pregnancy, intestinal colonization and human disease	Rautava, Samuli; Luoto, Raakel; Salminen, Seppo; Isolauri, Erika	NATURE REVIEWS GASTROENTEROLOGY & HEPATOLOGY	OCT 2012	2012	9	10	565	576	10.1038/nrgastro.2012.144	294	26.73
Gut Microbiota, Inflammation, and Colorectal Cancer	Brennan, Caitlin A.; Garrett, Wendy S.	ANNUAL REVIEW OF MICROBIOLOGY, VOL 70	2016	2016	70		395	411	10.1146/annurev-micro-102215-095513	293	41.86
Intestinal microbiota, diet and health	Power, Susan E.; O'Toole, Paul W.; Stanton, Catherine; Ross, R. Paul; Fitzgerald, Gerald F.	BRITISH JOURNAL OF NUTRITION	FEB 14 2014	2014	111	3	387	402	10.1017/S0007114513002560	285	31.67
Extracellular Vesicles Derived from Gut Microbiota, Especially Akkermansia muciniphila, Protect the Progression of Dextran Sulfate Sodium-Induced Colitis	Kang, Chil-sung; Ban, Mingi; Choi, Eun-Jeong; Moon, Hyung-Geun; Jeon, Jun-Sung; Kim, Dae-Kyum; Park, Soo-Kyung; Jeon, Seong Gyu; Roh, Tae-Young; Myung, Seung-Jae; Gho, Yong Song; Kim, Jae Gyu; Kim, Yoon-Keun	PLOS ONE	OCT 24 2013	2013	8	10			10.1371/journal.pone.0076520	281	28.1
Impact of Omega-3 Fatty Acids on the Gut Microbiota	Costantini, Lara; Molinari, Romina; Farinon, Barbara; Merendino, Nicolo	INTERNATIONAL JOURNAL OF MOLECULAR SCIENCES	DEC 2017	2017	18	12			10.3390/ijms18122645	279	46.5
The Th17 Pathway and Inflammatory Diseases of the Intestines, Lungs, and Skin	Weaver, Casey T.; Elson, Charles O.; Fouser, Lynette A.; Kolls, Jay K.	ANNUAL REVIEW OF PATHOLOGY: MECHANISMS OF DISEASE, VOL 8	2013	2013	8		477	512	10.1146/annurev-pathol-011110-130318	277	27.7
Cesarean Section and Chronic Immune Disorders	Sevelsted, Astrid; Stokholm, Jakob; Bonnelykke, Klaus; Bisgaard, Hans	PEDIATRICS	JAN 2015	2015	135	1	E92	E98	10.1542/peds.2014-0596	274	34.25
Gut microbiota utilize immunoglobulin A for mucosal colonization	Donaldson, G. P.; Ladinsky, M. S.; Yu, K. B.; Sanders, J. G.; Yoo, B. B.; Chou, W. -C.; Conner, M. E.; Earl, A. M.; Knight, R.; Bjorkman, P. J.; Mazmanian, S. K.	SCIENCE	MAY 18 2018	2018	360	6390	795	+	10.1126/science.aaq0926	272	54.4
Roles of intestinal epithelial cells in the maintenance of gut homeostasis	Okumura, Ryu; Takeda, Kiyoshi	EXPERIMENTAL AND MOLECULAR MEDICINE	MAY 2017	2017	49				10.1038/emm.2017.20	267	44.5
Secretory antibodies in breast milk promote long-term intestinal homeostasis by regulating the gut microbiota and host gene expression	Rogier, Eric W.; Frantz, Aubrey L.; Bruno, Maria E. C.; Wedlund, Leia; Cohen, Donald A.; Stromberg, Arnold J.; Kaetzel, Charlotte S.	PROCEEDINGS OF THE NATIONAL ACADEMY OF SCIENCES OF THE UNITED STATES OF AMERICA	FEB 25 2014	2014	111	8	3074	3079	10.1073/pnas.1315792111	267	29.67
Probiotics, Prebiotics and Immunomodulation of Gut Mucosal Defences: Homeostasis and Immunopathology	Hardy, Holly; Harris, Jennifer; Lyon, Eleanor; Beal, Jane; Foey, Andrew D.	NUTRIENTS	JUN 2013	2013	5	6	1869	1912	10.3390/nu5061869	259	25.9
The gut microbiome: Relationships with disease and opportunities for therapy	Durack, Juliana; Lynch, Susan V.	JOURNAL OF EXPERIMENTAL MEDICINE	JAN 2019	2019	216	1	20	40	10.1084/jem.20180448	262	65.5
Vagus Nerve as Modulator of the Brain-Gut Axis in Psychiatric and Inflammatory Disorders	Breit, Sigrid; Kupferberg, Aleksandra; Rogler, Gerhard; Hasler, Gregor	FRONTIERS IN PSYCHIATRY	MAR 13 2018	2018	9				10.3389/fpsyt.2018.00044	259	51.8
Intestinal microbiota in health and disease: Role of bifidobacteria in gut homeostasis	Tojo, Rafael; Suarez, Adolfo; Clemente, Marta G.; de los Reyes-Gavilan, Clara G.; Margolles, Abelardo; Gueimonde, Miguel; Ruas-Madiedo, Patricia	WORLD JOURNAL OF GASTROENTEROLOGY	NOV 7 2014	2014	20	41	15163	15176	10.3748/wjg.v20.i41.15163	258	28.67
Interactions between Intestinal Microbiota and Host Immune Response in Inflammatory Bowel Disease	Zhang, Ming; Sun, Kaiji; Wu, Yujun; Yang, Ying; Tso, Patrick; Wu, Zhenlong	FRONTIERS IN IMMUNOLOGY	AUG 14 2017	2017	8		1	13	10.3389/fimmu.2017.00942	254	42.33
The Gastrointestinal Microbiome: A Review	Barko, P. C.; McMichael, M. A.; Swanson, K. S.; Williams, D. A.	JOURNAL OF VETERINARY INTERNAL MEDICINE	JAN-FEB 2018	2018	32	1	9	25	10.1111/jvim.14875	254	50.8
Mend Your Fences The Epithelial Barrier and its Relationship With Mucosal Immunity in Inflammatory Bowel Disease	Martini, Eva; Krug, Susanne M.; Siegmund, Britta; Neurath, Markus F.; Becker, Christoph	CELLULAR AND MOLECULAR GASTROENTEROLOGY AND HEPATOLOGY	JUL 2017	2017	4	1	33	46	10.1016/j.jcmgh.2017.03.007	253	42.17
Diverging inflammasome signals in tumorigenesis and potential targeting	Karki, Rajendra; Kanneganti, Thirumala-Devi	NATURE REVIEWS CANCER	APR 2019	2019	19	4	197	214	10.1038/s41568-019-0123-y	250	62.5
Microbes, metabolites, and the gut-lung axis	Anh Thu Dang; Marsland, Benjamin J.	MUCOSAL IMMUNOLOGY	JUL 2019	2019	12	4	843	850	10.1038/s41385-019-0160-6	249	62.25
Homeostasis of the gut barrier and potential biomarkers	Wells, Jerry M.; Brummer, Robert J.; Derrien, Muriel; MacDonald, Thomas T.; Troost, Freddy; Cani, Patrice D.; Theodorou, Vassilia; Dekker, Jan; Meheust, Agnes; de Vos, Willem M.; Mercenier, Annick; Nauta, Arjen; Garcia-Rodenas, Clara L.	AMERICAN JOURNAL OF PHYSIOLOGY-GASTROINTESTINAL AND LIVER PHYSIOLOGY	MAR 2017	2017	312	3	G171	G193	10.1152/ajpgi.00048.2015	248	41.33
The Intestinal Microbiota Contributes to the Ability of Helminths to Modulate Allergic Inflammation	Zaiss, Mario M.; Rapin, Alexis; Lebon, Luc; Dubey, Lalit Kumar; Mosconi, Ilaria; Sarter, Kerstin; Piersigilli, Alessandra; Menin, Laure; Walker, Alan W.; Rougemont, Jacques; Paerewijck, Oonagh; Geldhof, Peter; McCoy, Kathleen D.; Macpherson, Andrew J.; Croese, John; Giacomin, Paul R.; Loukas, Alex; Junt, Tobias; Marsland, Benjamin J.; Harris, Nicola L.	IMMUNITY	NOV 17 2015	2015	43	5	998	1010	10.1016/j.immuni.2015.09.012	247	30.88
Mechanisms regulating intestinal barrier integrity and its pathological implications	Chelakkot, Chaithanya; Ghim, Jaewang; Ryu, Sung Ho	EXPERIMENTAL AND MOLECULAR MEDICINE	AUG 16 2018	2018	50				10.1038/s12276-018-0126-x	243	48.6
Colorectal cancer in inflammatory bowel disease: The risk, pathogenesis, prevention and diagnosis	Kim, Eun Ran; Chang, Dong Kyung	WORLD JOURNAL OF GASTROENTEROLOGY	AUG 21 2014	2014	20	29	9872	9881	10.3748/wjg.v20.i29.9872	237	26.33
Neuropeptides and the Microbiota-Gut-Brain Axis	Holzer, Peter; Farzi, Aitak	MICROBIAL ENDOCRINOLOGY: THE MICROBIOTA-GUT-BRAIN AXIS IN HEALTH AND DISEASE	2014	2014	817		195	219	10.1007/978-1-4939-0897-4_9	238	26.44
Smoking Cessation Induces Profound Changes in the Composition of the Intestinal Microbiota in Humans	Biedermann, Luc; Zeitz, Jonas; Mwinyi, Jessica; Sutter-Minder, Eveline; Rehman, Ateequr; Ott, Stephan J.; Steurer-Stey, Claudia; Frei, Anja; Frei, Pascal; Scharl, Michael; Loessner, Martin J.; Vavricka, Stephan R.; Fried, Michael; Schreiber, Stefan; Schuppler, Markus; Rogler, Gerhard	PLOS ONE	MAR 14 2013	2013	8	3			10.1371/journal.pone.0059260	235	23.5
Effects of Antibiotics on Gut Microbiota	Lange, Kathleen; Buerger, Martin; Stallmach, Andreas; Bruns, Tony	DIGESTIVE DISEASES	2016	2016	34	3	260	268	10.1159/000443360	234	33.43
Role of Lactobacillus reuteri in Human Health and Diseases	Mu, Qinghui; Tavella, Vincent J.; Luo, Xin M.	FRONTIERS IN MICROBIOLOGY	APR 19 2018	2018	9				10.3389/fmicb.2018.00757	228	45.6
Host-microbiota interactions in inflammatory bowel disease	Caruso, Roberta; Lo, Bernard C.; Nunez, Gabriel	NATURE REVIEWS IMMUNOLOGY	JUL 2020	2020	20	7	411	426	10.1038/s41577-019-0268-7	223	74.33
The Gut Microbiome Alterations and Inflammation-Driven Pathogenesis of Alzheimer's Diseasea Critical Review	Sochocka, Marta; Donskow-Lysoniewska, Katarzyna; Diniz, Breno Satler; Kurpas, Donata; Brzozowska, Ewa; Leszek, Jerzy	MOLECULAR NEUROBIOLOGY	MAR 2019	2019	56	3	1841	1851	10.1007/s12035-018-1188-4	223	55.75
Aspects of Gut Microbiota and Immune System Interactions in Infectious Diseases, Immunopathology, and Cancer	Lazar, Veronica; Ditu, Lia-Mara; Pircalabioru, Gratiela Gradisteanu; Gheorghe, Irina; Curutiu, Carmen; Holban, Alina Maria; Picu, Ariana; Petcu, Laura; Chifiriuc, Mariana Carmen	FRONTIERS IN IMMUNOLOGY	AUG 15 2018	2018	9				10.3389/fimmu.2018.01830	223	44.6
Benefits of short-chain fatty acids and their receptors in inflammation and carcinogenesis	Sivaprakasam, Sathish; Prasad, Puttur D.; Singh, Nagendra	PHARMACOLOGY & THERAPEUTICS	AUG 2016	2016	164		144	151	10.1016/j.pharmthera.2016.04.007	221	31.57
Role of the gut microbiota in inflammatory bowel disease pathogenesis: What have we learnt in the past 10 years?	Hold, Georgina L.; Smith, Megan; Grange, Charlie; Watt, Euan Robert; El-Omar, Emad M.; Mukhopadhya, Indrani	WORLD JOURNAL OF GASTROENTEROLOGY	FEB 7 2014	2014	20	5	1192	1210	10.3748/wjg.v20.i5.1192	211	23.44
Recent advances in inflammatory bowel disease: mucosal immune cells in intestinal inflammation	Cader, M. Zaeem; Kaser, Arthur	GUT	NOV 2013	2013	62	11	1653	1664	10.1136/gutjnl-2012-303955	220	22
Microbial genes and pathways in inflammatory bowel disease	Schirmer, Melanie; Garner, Ashley; Vlamakis, Hera; Xavier, Ramnik J.	NATURE REVIEWS MICROBIOLOGY	AUG 2019	2019	17	8	497	511	10.1038/s41579-019-0213-6	216	54
Intestinal Inflammation and Mucosal Barrier Function	Sanchez de Medina, Fermin; Romero-Calvo, Isabel; Mascaraque, Cristina; Martinez-Augustin, Olga	INFLAMMATORY BOWEL DISEASES	DEC 2014	2014	20	12	2394	2404	10.1097/MIB.0000000000000204	217	24.11
A Comprehensive Review and Update on the Pathogenesis of Inflammatory Bowel Disease	Guan, Qingdong	JOURNAL OF IMMUNOLOGY RESEARCH	DEC 1 2019	2019	2019				10.1155/2019/7247238	215	53.75
Interaction between the gut microbiome and mucosal immune system	Shi, Na; Li, Na; Duan, Xinwang; Niu, Haitao	MILITARY MEDICAL RESEARCH	APR 27 2017	2017	4				10.1186/s40779-017-0122-9	213	35.5
Dynamics of metatranscription in the inflammatory bowel disease gut microbiome	Schirmer, Melanie; Franzosa, Eric A.; Lloyd-Price, Jason; McIver, Lauren J.; Schwager, Randall; Poon, Tiffany W.; Ananthakrishnan, Ashwin N.; Andrews, Elizabeth; Barron, Gildardo; Lake, Kathleen; Prasad, Mahadev; Sauk, Jenny; Stevens, Betsy; Wilson, Robin G.; Braun, Jonathan; Denson, Lee A.; Kugathasan, Subra; McGovern, Dermot P. B.; Vlamakis, Hera; Xavier, Ramnik J.; Huttenhower, Curtis	NATURE MICROBIOLOGY	MAR 2018	2018	3	3	337	346	10.1038/s41564-017-0089-z	212	42.4
Microbiota metabolite short-chain fatty acid acetate promotes intestinal IgA response to microbiota which is mediated by GPR43	Wu, W.; Sun, M.; Chen, F.; Cao, A. T.; Liu, H.; Zhao, Y.; Huang, X.; Xiao, Y.; Yao, S.; Zhao, Q.; Liu, Z.; Cong, Y.	MUCOSAL IMMUNOLOGY	JUL 2017	2017	10	4	946	956	10.1038/mi.2016.114	213	35.5
Adherent-invasive Escherichia coli in inflammatory bowel disease	Palmela, Carolina; Chevarin, Caroline; Xu, Zhilu; Torres, Joana; Sevrin, Gwladys; Hirten, Robert; Barnich, Nicolas; Ng, Siew C.; Colombel, Jean-Frederic	GUT	MAR 2018	2018	67	3	574	587	10.1136/gutjnl-2017-314903	210	42
Are Short Chain Fatty Acids in Gut Microbiota Defensive Players for Inflammation and Atherosclerosis?	Ohira, Hideo; Tsutsui, Wao; Fujioka, Yoshio	JOURNAL OF ATHEROSCLEROSIS AND THROMBOSIS	2017	2017	24	7	660	672	10.5551/jat.RV17006	207	34.5
Modulation of intestinal barrier by intestinal microbiota: Pathological and therapeutic implications	Natividad, Jane M. M.; Verdu, Elena F.	PHARMACOLOGICAL RESEARCH	MAR 2013	2013	69	1	42	51	10.1016/j.phrs.2012.10.007	208	20.8
The gut microbial profile in patients with primary sclerosing cholangitis is distinct from patients with ulcerative colitis without biliary disease and healthy controls	Kummen, Martin; Holm, Kristian; Anmarkrud, Jarl Andreas; Nygard, Stale; Vesterhus, Mette; Hoivik, Marte L.; Troseid, Marius; Marschall, Hanns-Ulrich; Schrumpf, Erik; Moum, Bjorn; Rosjo, Helge; Aukrust, Pal; Karlsen, Tom H.; Hov, Johannes R.	GUT	APR 2017	2017	66	4	611	619	10.1136/gutjnl-2015-310500	207	34.5
Microbiota-Liver Axis in Hepatic Disease	Chassaing, Benoit; Etienne-Mesmin, Lucie; Gewirtz, Andrew T.	HEPATOLOGY	JAN 2014	2014	59	1	328	339	10.1002/hep.26494	205	22.78
short chain fatty acids as potential therapeutic agents in human gastrointestinal and inflammatory disorders	Gill, P. A.; van Zelm, M. C.; Muir, J. G.; Gibson, P. R.	ALIMENTARY PHARMACOLOGY & THERAPEUTICS	JUL 2018	2018	48	1	15	34	10.1111/apt.14689	200	40
Regulation of lung immunity and host defense by the intestinal microbiota	Samuelson, Derrick R.; Welsh, David A.; Shellito, Judd E.	FRONTIERS IN MICROBIOLOGY	OCT 7 2015	2015	6				10.5389/fmicb.2015.01085	198	24.75
Relationship between intestinal microbiota and ulcerative colitis: Mechanisms and clinical application of probiotics and fecal microbiota transplantation	Shen, Zhao-Hua; Zhu, Chang-Xin; Quan, Yong-Sheng; Yang, Zhen-Yu; Wu, Shuai; Luo, Wei-Wei; Tan, Bei; Wang, Xiao-Yan	WORLD JOURNAL OF GASTROENTEROLOGY	JAN 7 2018	2018	24	1	5	14	10.3748/wjg.v24.i1.5	191	38.2
Pro- and anti-inflammatory effects of short chain fatty acids on immune and endothelial cells	Li, Meng; van Esch, Betty C. A. M.; Wagenaar, Gerry T. M.; Garssen, Johan; Folkerts, Gert; Henricks, Paul A. J.	EUROPEAN JOURNAL OF PHARMACOLOGY	JUL 15 2018	2018	831		52	59	10.1016/j.ejphar.2018.05.003	187	37.4
New insights into the interplay between autophagy, gut microbiota and inflammatory responses in IBD	Larabi, Anais; Barnich, Nicolas; Hang Thi Thu Nguyen	AUTOPHAGY	JAN 2 2020	2020	16	1	38	51	10.1080/15548627.2019.1635384	184	46
The human gut microbiota: Metabolism and perspective in obesity	Gomes, Aline Corado; Hoffmann, Christian; Mota, Joao Felipe	GUT MICROBES	2018	2018	9	4	308	325	10.1080/19490976.2018.1465157	183	36.6
Human Anti-fungal Th17 Immunity and Pathology Rely on Cross-Reactivity against Candida albicans	Bacher, Petra; Hohnstein, Thordis; Beerbaum, Eva; Roecker, Marie; Blango, Matthew G.; Kaufmann, Svenja; Roehmel, Jobst; Eschenhagen, Patience; Grehn, Claudia; Seidel, Kathrin; Rickerts, Volker; Lozza, Laura; Stervbo, Ulrik; Nienen, Mikalai; Babel, Nina; Milleck, Julia; Assenmacher, Mario; Cornely, Oliver A.; Ziegler, Maren; Wisplinghoff, Hilmar; Heine, Guido; Worm, Margitta; Siegmund, Britta; Mau…	CELL	MAR 7 2019	2019	176	6	1340	+	10.1016/j.cell.2019.01.041	180	45
Negative Effects of a High-Fat Diet on Intestinal Permeability: A Review	Rohr, Michael W.; Narasimhulu, Chandrakala A.; Rudeski-Rohr, Trina A.; Parthasarathy, Sampath	ADVANCES IN NUTRITION	JAN 2020	2020	11	1	77	91	10.1093/advances/nmz061	177	59
Functional Characterization of Novel Faecalibacterium prausnitzii Strains Isolated from Healthy Volunteers: A Step Forward in the Use of F. prausnitzii as a Next-Generation Probiotic	Martin, Rebeca; Miquel, Sylvie; Benevides, Leandro; Bridonneau, Chantal; Robert, Veronique; Hudault, Sylvie; Chain, Florian; Berteau, Olivier; Azevedo, Vasco; Chatel, Jean M.; Sokol, Harry; Bermudez-Humaran, Luis G.; Thomas, Muriel; Langella, Philippe	FRONTIERS IN MICROBIOLOGY	JUN 30 2017	2017	8				10.3389/fmicb.2017.01226	175	29.17
Linking the gut microbiota to human health	Robles Alonso, Virginia; Guarner, Francisco	BRITISH JOURNAL OF NUTRITION	JAN 2013	2013	109		S21	S26	10.1017/S0007114512005235	174	17.4
Association of Fusobacterium nucleatum with immunity and molecular alterations in colorectal cancer	Nosho, Katsuhiko; Sukawa, Yasutaka; Adachi, Yasushi; Ito, Miki; Mitsuhashi, Kei; Kurihara, Hiroyoshi; Kanno, Shinichi; Yamamoto, Itaru; Ishigami, Keisuke; Igarashi, Hisayoshi; Maruyama, Reo; Imai, Kohzoh; Yamamoto, Hiroyuki; Shinomura, Yasuhisa	WORLD JOURNAL OF GASTROENTEROLOGY	JAN 14 2016	2016	22	2	557	566	10.3748/wjg.v22.i2.557	174	24.86
Food Components and Dietary Habits: Keys for a Healthy Gut Microbiota Composition	Rinninella, Emanuele; Cintoni, Marco; Raoul, Pauline; Lopetuso, Loris Riccardo; Scaldaferri, Franco; Pulcini, Gabriele; Miggiano, Giacinto Abele Donato; Gasbarrini, Antonio; Mele, Maria Cristina	NUTRIENTS	OCT 2019	2019	11	10			10.3390/nu11102393	174	43.5
Bilophila wadsworthia aggravates high fat diet induced metabolic dysfunctions in mice	Natividad, Jane M.; Lamas, Bruno; Hang Phuong Pham; Michel, Marie-Laure; Rainteau, Dominique; Bridonneau, Chantal; da Costa, Gregory; Vlieg, Johan van Hylckama; Sovran, Bruno; Chamignon, Celia; Planchais, Julien; Richard, Mathias L.; Langella, Philippe; Veiga, Patrick; Sokol, Harry	NATURE COMMUNICATIONS	JUL 18 2018	2018	9				10.1038/s41467-018-05249-7	173	34.6
A Cross-Talk Between Microbiota-Derived Short-Chain Fatty Acids and the Host Mucosal Immune System Regulates Intestinal Homeostasis and Inflammatory Bowel Disease	Goncalves, Pedro; Araujo, Joao Ricardo; Di Santo, James P.	INFLAMMATORY BOWEL DISEASES	MAR 2018	2018	24	3	558	572	10.1093/ibd/izx029	166	33.2
Hyaluronic acid-bilirubin nanomedicine for targeted modulation of dysregulated intestinal barrier, microbiome and immune responses in colitis	Lee, Yonghyun; Sugihara, Kohei; Gillilland, Merritt G., III; Jon, Sangyong; Kamada, Nobuhiko; Moon, James J.	NATURE MATERIALS	JAN 2020	2020	19	1	118	+	10.1038/s41563-019-0462-9	165	55
Microbiome-host systems interactions: protective effects of propionate upon the blood-brain barrier	Hoyles, Lesley; Snelling, Tom; Umlai, Umm-Kulthum; Nicholson, Jeremy K.; Carding, Simon R.; Glen, Robert C.; McArthur, Simon	MICROBIOME	MAR 21 2018	2018	6				10.1186/s40168-018-0439-y	165	33
Immunomodulatory potential of gut microbiome-derived short-chain fatty acids (SCFAs)	Ratajczak, Weronika; Ryl, Aleksandra; Mizerski, Arnold; Walczakiewicz, Kinga; Sipak, Olimpia; Laszczynska, Maria	ACTA BIOCHIMICA POLONICA	2019	2019	66	1	1	12	10.18388/abp.2018_2648	163	40.75
Nutrients Mediate Intestinal Bacteria-Mucosal Immune Crosstalk	Ma, Ning; Guo, Pingting; Zhang, Jie; He, Ting; Kim, Sung Woo; Zhang, Guolong; Ma, Xi	FRONTIERS IN IMMUNOLOGY	JAN 24 2018	2018	9				10.3389/fimmu.2018.00005	159	31.8
Role of TLR4 in the gut-brain axis in Parkinson's disease: a translational study from men to mice	Perez-Pardo, Paula; Dodiya, Hemraj B.; Engen, Phillip A.; Forsyth, Christopher B.; Huschens, Andrea M.; Shaikh, Maliha; Voigt, Robin M.; Naqib, Ankur; Green, Stefan J.; Kordower, Jeffrey H.; Shannon, Kathleen M.; Garssen, Johan; Kraneveld, Aletta D.; Keshavarzian, Ali	GUT	MAY 2019	2019	68	5	829	843	10.1136/gutjnl-2018-316844	157	39.25
The role of the microbiome for human health: from basic science to clinical applications	Mohajeri, M. Hasan; Brummer, Robert J. M.; Rastall, Robert A.; Weersma, Rinse K.; Harmsen, Hermie J. M.; Faas, Marijke; Eggersdorfer, Manfred	EUROPEAN JOURNAL OF NUTRITION	MAY 2018	2018	57		S1	S14	10.1007/s00394-018-1703-4	157	31.4
Circulating and Tissue-Resident CD4(+) T Cells With Reactivity to Intestinal Microbiota Are Abundant in Healthy Individuals and Function Is Altered During Inflammation	Hegazy, Ahmed N.; West, Nathaniel R.; Stubbington, Michael J. T.; Wendt, Emily; Suijker, Kim I. M.; Datsi, Angeliki; This, Sebastien; Danne, Camille; Campion, Suzanne; Duncan, Sylvia H.; Owens, Benjamin M. J.; Uhlig, Holm H.; McMichael, Andrew; Bergthaler, Andreas; Teichmann, Sarah A.; Keshav, Satish; Powrie, Fiona	GASTROENTEROLOGY	NOV 2017	2017	153	5	1320	+	10.1053/j.gastro.2017.07.047	154	25.67
Crohn's disease	Roda, Giulia; Ng, Siew Chien; Kotze, Paulo Gustavo; Argollo, Marjorie; Panaccione, Remo; Spinelli, Antonino; Kaser, Arthur; Peyrin-Biroulet, Laurent; Danese, Silvio	NATURE REVIEWS DISEASE PRIMERS	APR 2 2020	2020	6	1			10.1038/s41572-020-0156-2	153	51
Autoimmune hepatitis	Mieli-Vergani, Giorgina; Vergani, Diego; Czaja, Albert J.; Manns, Michael P.; Krawitt, Edward L.; Vierling, John M.; Lohse, Ansgar W.; Montano-Loza, Aldo J.	NATURE REVIEWS DISEASE PRIMERS	APR 12 2018	2018	4				10.1038/nrdp.2018.17	153	30.6
Transfer of a healthy microbiota reduces amyloid and tau pathology in an Alzheimer's disease animal model	Kim, Min-Soo; Kim, Yoonhee; Choi, Hyunjung; Kim, Woojin; Park, Sumyung; Lee, Dongjoon; Kim, Dong Kyu; Kim, Haeng Jun; Choi, Hayoung; Hyun, Dong-Wook; Lee, June-Young; Choi, Eun Young; Lee, Dong-Sup; Bae, Jin-Woo; Mook-Jung, Inhee	GUT	FEB 2020	2020	69	2	283	294	10.1136/gutjnl-2018-317431	152	50.67
Microbiota dysbiosis and barrier dysfunction in inflammatory bowel disease and colorectal cancers: exploring a common ground hypothesis	Yu, Linda Chia-Hui	JOURNAL OF BIOMEDICAL SCIENCE	NOV 9 2018	2018	25				10.1186/s12929-018-0483-8	148	29.6
Malassezia Is Associated with Crohn's Disease and Exacerbates Colitis in Mouse Models	Limon, Jose J.; Tang, Jie; Li, Dalin; Wolf, Andrea J.; Michelsen, Kathrin S.; Funari, Vince; Gargus, Matthew; Nguyen, Christopher; Sharma, Purnima; Maymi, Viviana, I; Iliev, Iliyan D.; Skalski, Joseph H.; Brown, Jordan; Landers, Carol; Borneman, James; Braun, Jonathan; Targan, Stephan R.; McGovern, Dermot Pb; Underhill, David M.	CELL HOST & MICROBE	MAR 13 2019	2019	25	3	377	+	10.1016/j.chom.2019.01.007	141	35.25
Potential role of the intestinal microbiota in programming health and disease	Goulet, Olivier	NUTRITION REVIEWS	AUG 2015	2015	73		32	40	10.1093/nutrit/nuv039	142	17.75
Gut pathobionts underlie intestinal barrier dysfunction and liver T helper 17 cell immune response in primary sclerosing cholangitis	Nakamoto, Nobuhiro; Sasaki, Nobuo; Aoki, Ryo; Miyamoto, Kentaro; Suda, Wataru; Teratani, Toshiaki; Suzuki, Takahiro; Koda, Yuzo; Chu, Po-Sung; Taniki, Nobuhito; Yamaguchi, Akihiro; Kanamori, Mitsuhiro; Kamada, Nobuhiko; Hattori, Masahira; Ashida, Hiroshi; Sakamoto, Michiie; Atarashi, Koji; Narushima, Seiko; Yoshimura, Akihiko; Honda, Kenya; Sato, Toshiro; Kanai, Takanori	NATURE MICROBIOLOGY	MAR 2019	2019	4	3	492	503	10.1038/s41564-018-0333-1	139	34.75
A double-blind, randomized, placebo-controlled trial of Lactobacillus helveticus and Bifidobacterium longum for the symptoms of depression	Romijn, Amy R.; Rucklidge, Julia J.; Kuijer, Roeline G.; Frampton, Chris	AUSTRALIAN AND NEW ZEALAND JOURNAL OF PSYCHIATRY	AUG 2017	2017	51	8	810	821	10.1177/0004867416686694	135	22.5
Functional Gastrointestinal Disorders 2 Irritable bowel syndrome	Ford, Alexander C.; Sperber, Ami D.; Corsetti, Maura; Camilleri, Michael	LANCET	NOV 21 2020	2020	396	10263	1675	1688	10.1016/S0140-6736(20)31548-8	133	44.33
Epithelial Toll-like receptors and their role in gut homeostasis and disease	Burgueno, Juan F.; Abreu, Maria T.	NATURE REVIEWS GASTROENTEROLOGY & HEPATOLOGY	MAY 2020	2020	17	5	263	278	10.1038/s41575-019-0261-4	118	39.33
Gut Microbiota Regulation of T Cells During Inflammation and Autoimmunity	Brown, Eric M.; Kenny, Douglas J.; Xavier, Ramnik J.	ANNUAL REVIEW OF IMMUNOLOGY, VOL 37, 2019	2019	2019	37		599	624	10.1146/annurev-immunol-042718-041841	117	29.25
Metabolic Functions of Gut Microbes Associate With Efficacy of Tumor Necrosis Factor Antagonists in Patients With Inflammatory Bowel Diseases	Aden, Konrad; Rehman, Ateequr; Waschina, Silvio; Pan, Wei-Hung; Walker, Alesia; Lucio, Marianna; Nunez, Alejandro Mena; Bharti, Richa; Zimmerman, Johannes; Bethge, Johannes; Schulte, Berenice; Schulte, Dominik; Franke, Andre; Nikolaus, Susanna; Schroeder, Johann Oltmann; Vandeputte, Doris; Raes, Jeroen; Szymczak, Silke; Waetzig, Georg H.; Zeuner, Rainald; Schmitt-Kopplin, Philippe; Kaleta, Christ…	GASTROENTEROLOGY	NOV 2019	2019	157	5	1279	+	10.1053/j.gastro.2019.07.025	116	29
Factors Affecting Gastrointestinal Microbiome Development in Neonates	Chong, Clara Yieh Lin; Bloomfield, Frank H.; O'Sullivan, Justin M.	NUTRIENTS	MAR 2018	2018	10	3			10.3390/nu10030274	112	22.4
The Role of the Canine Gut Microbiome and Metabolome in Health and Gastrointestinal Disease	Pilla, Rachel; Suchodolski, Jan S.	FRONTIERS IN VETERINARY SCIENCE	JAN 14 2020	2020	6				10.3389/fvets.2019.00498	108	36
Effects of polysaccharides from purple sweet potatoes on immune response and gut microbiota composition in normal and cyclophosphamide treated mice	Tang, Chao; Sun, Jian; Zhou, Bo; Jin, Changhai; Liu, Jun; Kan, Juan; Qian, Chunlu; Zhang, Nianfeng	FOOD & FUNCTION	FEB 2018	2018	9	2	937	950	10.1039/c7fo01302g	102	20.4
Overview and systematic review of studies of microbiome in schizophrenia and bipolar disorder	Nguyen, Tanya T.; Kosciolek, Tomasz; Eyler, Lisa T.; Knight, Rob; Jeste, Dilip V.	JOURNAL OF PSYCHIATRIC RESEARCH	APR 2018	2018	99		50	61	10.1016/j.jpsychires.2018.01.013	100	20
Biomarkers of gastrointestinal functionality in animal nutrition and health	Pietro, Celi; Viviane, Verlhac; Estefania, Perez Calvo; Jerome, Schmeisser; Anna-Maria, Kluenter	ANIMAL FEED SCIENCE AND TECHNOLOGY	APR 2019	2019	250		9	31	10.1016/j.anifeedsci.2018.07.012	88	22
The impacts of natural polysaccharides on intestinal microbiota and immune responses - a review	Tang, Chao; Ding, Ruoxi; Sun, Jian; Liu, Jun; Kan, Juan; Jin, Changhai	FOOD & FUNCTION	MAY 1 2019	2019	10	5	2290	2312	10.1039/c8fo01946k	88	22
Bifidobacteria-mediated immune system imprinting early in life	Henrick, Bethany M.; Rodriguez, Lucie; Lakshmikanth, Tadepally; Pou, Christian; Henckel, Ewa; Arzoomand, Aron; Olin, Axel; Wang, Jun; Mikes, Jaromir; Tan, Ziyang; Chen, Yang; Ehrlich, Amy M.; Bernhardsson, Anna Karin; Mugabo, Constantin Habimana; Ambrosiani, Ylva; Gustafsson, Anna; Chew, Stephanie; Brown, Heather K.; Prambs, Johann; Bohlin, Kajsa; Mitchell, Ryan D.; Underwood, Mark A.; Smilowitz,…	CELL	JUL 22 2021	2021	184	15	3884	+	10.1016/j.cell.2021.05.030	87	43.5
Diet Supplementation, Probiotics, and Nutraceuticals in SARS-CoV-2 Infection: A Scoping Review	Infusino, Fabio; Marazzato, Massimiliano; Mancone, Massimo; Fedele, Francesco; Mastroianni, Claudio Maria; Severino, Paolo; Ceccarelli, Giancarlo; Santinelli, Letizia; Cavarretta, Elena; Marullo, Antonino G. M.; Miraldi, Fabio; Carnevale, Roberto; Nocella, Cristina; Biondi-Zoccai, Giuseppe; Pagnini, Cristiano; Schiavon, Sonia; Pugliese, Francesco; Frati, Giacomo; D'Ettorre, Gabriella	NUTRIENTS	JUN 2020	2020	12	6			10.3390/nu12061718	87	29
The Role of Succinate in the Regulation of Intestinal Inflammation	Connors, Jessica; Dawe, Nick; Van Limbergen, Johan	NUTRIENTS	JAN 2019	2019	11	1			10.3390/nu11010025	86	21.5
Dietary effects of soybean products on gut microbiota and immunity of aquatic animals: A review	Zhou, Z.; Ringo, E.; Olsen, R. E.; Song, S. K.	AQUACULTURE NUTRITION	FEB 2018	2018	24	1	644	665	10.1111/anu.12532	85	17
The gut microbiome in coronary artery disease and heart failure: Current knowledge and future directions	Troseid, Marius; Andersen, Geir Oystein; Broch, Kaspar; Hov, Johannes Roksund	EBIOMEDICINE	FEB 2020	2020	52				10.1016/j.ebiom.2020.102649	80	26.67
Nutrition, IBD and Gut Microbiota: A Review	Mentella, Maria Chiara; Scaldaferri, Franco; Pizzoferrato, Marco; Gasbarrini, Antonio; Miggiano, Giacinto Abele Donato	NUTRIENTS	APR 2020	2020	12	4			10.3390/nu12040944	73	24.33
Oxyberberine, a novel gut microbiota-mediated metabolite of berberine, possesses superior anti-colitis effect: Impact on intestinal epithelial barrier, gut microbiota profile and TLR4-MyD88-NF-kappa B pathway	Li, Cailan; Ai, Gaoxiang; Wang, Yongfu; Lu, Qiang; Luo, Chaodan; Tan, Lihua; Lin, Guosheng; Liu, Yuhong; Li, Yucui; Zeng, Huifang; Chen, Jiannan; Lin, Zhixiu; Xian, Yanfang; Huang, Xiaoqi; Xie, Jianhui; Su, Ziren	PHARMACOLOGICAL RESEARCH	FEB 2020	2020	152				10.1016/j.phrs.2019.104603	73	24.33
Role of gut-brain axis, gut microbial composition, and probiotic intervention in Alzheimer's disease	Kesika, Periyanaina; Suganthy, Natarajan; Sivamaruthi, Bhagavathi Sundaram; Chaiyasut, Chaiyavat	LIFE SCIENCES	JAN 1 2021	2021	264				10.1016/j.lfs.2020.118627	72	36
You Are What You Eat-The Relationship between Diet, Microbiota, and Metabolic Disorders-A Review	Moszak, Malgorzata; Szulinska, Monika; Bogdanski, Pawel	NUTRIENTS	APR 2020	2020	12	4			10.3390/nu12041096	68	22.67
The microbiota-immune axis as a central mediator of gut-brain communication	Fung, Thomas C.	NEUROBIOLOGY OF DISEASE	MAR 2020	2020	136				10.1016/j.nbd.2019.104714	66	22
Anti-Inflammatory and Immunomodulatory Effects of Probiotics in Gut Inflammation: A Door to the Body	Cristofori, Fernanda; Dargenio, Vanessa Nadia; Dargenio, Costantino; Miniello, Vito Leonardo; Barone, Michele; Francavilla, Ruggiero	FRONTIERS IN IMMUNOLOGY	FEB 26 2021	2021	12				10.3389/fimmu.2021.578386	64	32
From oxidative stress to inflammation: redox balance and immune system	Lauridsen, Charlotte	POULTRY SCIENCE	OCT 2019	2019	98	10	4240	4246	10.3382/ps/pey407	63	15.75
Thyroid-Gut-Axis: How Does the Microbiota Influence Thyroid Function?	Knezevic, Jovana; Starchl, Christina; Tmava Berisha, Adelina; Amrein, Karin	NUTRIENTS	JUN 2020	2020	12	6			10.3390/nu12061769	61	20.33
Short chain fatty acids and its producing organisms: An overlooked therapy for IBD?	Deleu, Sara; Machiels, Kathleen; Raes, Jeroen; Verbeke, Kristin; Vermeire, Severine	EBIOMEDICINE	APR 2021	2021	66				10.1016/j.ebiom.2021.103293	56	28
Nutritional Components in Western Diet Versus Mediterranean Diet at the Gut Microbiota-Immune System Interplay. Implications for Health and Disease	Garcia-Montero, Cielo; Fraile-Martinez, Oscar; Gomez-Lahoz, Ana M.; Pekarek, Leonel; Castellanos, Alejandro J.; Noguerales-Fraguas, Fernando; Coca, Santiago; Guijarro, Luis G.; Garcia-Honduvilla, Natalio; Asunsolo, Angel; Sanchez-Trujillo, Lara; Lahera, Guillermo; Bujan, Julia; Monserrat, Jorge; Alvarez-Mon, Melchor; Alvarez-Mon, Miguel A.; Ortega, Miguel A.	NUTRIENTS	FEB 2021	2021	13	2			10.3390/nu13020699	55	27.5
Targeting the gut-liver-immune axis to treat cirrhosis	Tranah, Thomas Henry; Edwards, Lindsey A.; Schnabl, Bernd; Shawcross, Debbie Lindsay	GUT	MAY 2021	2021	70	5	982	994	10.1136/gutjnl-2020-320786	46	23
The gut-joint axis in rheumatoid arthritis	Zaiss, Mario M.; Joyce Wu, Hsin-Jung; Mauro, Daniele; Schett, Georg; Ciccia, Francesco	NATURE REVIEWS RHEUMATOLOGY	APR 2021	2021	17	4	224	237	10.1038/s41584-021-00585-3	37	18.5
Review article: Probiotics, prebiotics and dietary approaches during COVID-19 pandemic	Hu, Jielun; Zhang, Lin; Lin, Winnie; Tang, Whitney; Chan, Francis K. L.; Ng, Siew C.	TRENDS IN FOOD SCIENCE & TECHNOLOGY	FEB 2021	2021	108		187	196	10.1016/j.tifs.2020.12.009	36	18
Multidimensional Impact of Mediterranean Diet on IBD Patients	Chicco, Fabio; Magri, Salvatore; Cingolani, Arianna; Paduano, Danilo; Pesenti, Mario; Zara, Federica; Tumbarello, Francesca; Urru, Emanuela; Melis, Alessandro; Casula, Laura; Fantini, Massimo Claudio; Usai, Paolo	INFLAMMATORY BOWEL DISEASES	JAN 2021	2021	27	1	1	9	10.1093/ibd/izaa097	34	17
Role of the gut microbiota in type 2 diabetes and related diseases	Yang, Ge; Wei, Jinlong; Liu, Pinyi; Zhang, Qihe; Tian, Yuan; Hou, Guowen; Meng, Lingbin; Xin, Ying; Jiang, Xin	METABOLISM-CLINICAL AND EXPERIMENTAL	APR 2021	2021	117				10.1016/j.metabol.2021.154712	33	16.5
Recipient factors in faecal microbiota transplantation: one stool does not fit all	Danne, Camille; Rolhion, Nathalie; Sokol, Harry	NATURE REVIEWS GASTROENTEROLOGY & HEPATOLOGY	JUL 2021	2021	18	7	503	513	10.1038/s41575-021-00441-5	32	16
Crosstalk between Gut and Brain in Alzheimer's Disease: The Role of Gut Microbiota Modulation Strategies	Shabbir, Umair; Arshad, Muhammad Sajid; Sameen, Aysha; Oh, Deog-Hwan	NUTRIENTS	FEB 2021	2021	13	2			10.3390/nu13020690	32	16
Location-specific cell identity rather than exposure to GI microbiota defines many innate immune signalling cascades in the gut epithelium	Kayisoglu, Ozge; Weiss, Franziska; Niklas, Carolin; Pierotti, Isabella; Pompaiah, Malvika; Wallaschek, Nina; Germer, Christoph-Thomas; Wiegering, Armin; Bartfeld, Sina	GUT	APR 2021	2021	70	4	687	+	10.1136/gutjnl-2019-319919	30	15
Omega-3 Polyunsaturated Fatty Acids and the Intestinal Epithelium-A Review	Durkin, Luke A.; Childs, Caroline E.; Calder, Philip C.	FOODS	JAN 2021	2021	10	1			10.3390/foods10010199	22	11
Probiotics, Prebiotics, and Phytogenic Substances for Optimizing Gut Health in Poultry	Shehata, Awad A.; Yalcin, Sakine; Latorre, Juan D.; Basiouni, Shereen; Attia, Youssef A.; Abd El-Wahab, Amr; Visscher, Christian; El-Seedi, Hesham R.; Huber, Claudia; Hafez, Hafez M.; Eisenreich, Wolfgang; Tellez-Isaias, Guillermo	MICROORGANISMS	FEB 2022	2022	10	2			10.3390/microorganisms10020395	11	11
Lactobacillus acidophilus ameliorates obesity in mice through modulation of gut microbiota dysbiosis and intestinal permeability	Kang, Yongbo; Kang, Xing; Yang, Hao; Liu, Haixia; Yang, Xiaodan; Liu, Qingqing; Tian, Haixia; Xue, Yang; Ren, Peng; Kuang, Xiaoyu; Cai, Yue; Tong, Mingwei; Li, Lin; Fan, Weiping	PHARMACOLOGICAL RESEARCH	JAN 2022	2022	175				10.1016/j.phrs.2021.106020	11	11
Metabolite-based dietary supplementation in human type 1 diabetes is associated with microbiota and immune modulation	Bell, Kirstine J.; Saad, Sonia; Tillett, Bree J.; McGuire, Helen M.; Bordbar, Sara; Yap, Yu Anne; Nguyen, Long T.; Wilkins, Marc R.; Corley, Susan; Brodie, Shannon; Duong, Sussan; Wright, Courtney J.; Twigg, Stephen; Groth, Barbara Fazekas de St; Harrison, Leonard C.; Mackay, Charles R.; Gurzov, Esteban N.; Hamilton-Williams, Emma E.; Marino, Eliana	MICROBIOME	JAN 19 2022	2022	10	1			10.1186/s40168-021-01193-9	9	9
Current advances in the anti-inflammatory effects and mechanisms of natural polysaccharides	Yuan, Dan; Li, Chao; Huang, Qiang; Fu, Xiong; Dong, Hao	CRITICAL REVIEWS IN FOOD SCIENCE AND NUTRITION		2022					10.1080/10408398.2022.2025535	7	7
The interaction among gut microbes, the intestinal barrier and short chain fatty acids	Ma, Jiayu; Piao, Xiangshu; Mahfuz, Shad; Long, Shenfei; Wang, Jian	ANIMAL NUTRITION	JUN 2022	2022	9		159	174	10.1016/j.aninu.2021.09.012	5	5
Probiotics: Potential novel therapeutics for microbiota-gut-brain axis dysfunction across gender and lifespan	Snigdha, Shikha; Ha, Kevin; Tsai, Paul; Dinan, Timothy G.; Bartos, Jeremy D.; Shahid, Mohammed	PHARMACOLOGY & THERAPEUTICS	MAR 2022	2022	231				10.1016/j.pharmthera.2021.107978	5	5
